# Supplementary material for: Health workforce retention situation and effect on service delivery in three highly deprived districts in Ghana: a mixed methods design
Source: Research Square preprint supplement (doi:10.21203/rs.3.rs-7685937/v1), 2025-10-17
Supplement: Supplementary file 1 [file ac903a750fd923f9e5f79696.docx]

**Tool 1: Qualitative interview for situational analysis**

| Interviewee ID |  | Job title and cadre of interviewee |  |
| --- | --- | --- | --- |
| Date of Interview |  | Name of district |  |
| Time of start of interview |  | Gender | Male □ Female □ |
| Time of end of interview |  | Age |  |
| Name of interviewer |  |  |  |
| Name of transcriber |  |  |  |

1. **Interviews with district and sub-district managers**

**Ice breaker**

- What is your current role?
- How long have you been in this role?

***Interview questions***

1. Tell us about the health workforce situation in this district, and in particular, tell us about retention of health workers here
2. What are the causes of the shortage/poor retention of health workers in your district? Are there any differences between women and men health workers with regard to staff retention?
3. How does poor retention of health workers impact health facility performance and service delivery in your district?
4. As health/HR manager, what actions have you taken to improve health workforce retention in your district? Were these actions different for men and women health workers?
5. What management competencies do you think you need that will help you improve health workers retention in your district?
6. What are the existing policies and practices in attracting and retaining health workers at the local levels of the health system? Do they show any differences between men and women health workers?
7. How are these policies and practices implemented in your district? What are factors that support/hinder their implementation?
8. What is the support needed from the health system and the community to implement those policies?
9. What do you think is the role of the community in improving health workforce retention in the district? And how to strengthen this role?

END OF INTERVIEW

1. **Interviews with community leaders**

**Ice breaker**

- What is your current role in the community?
- How long have you been in this role?

***Interview questions***

1. How do healthcare facilities function in your district in terms of availability of health workers and quality of healthcare provision?
2. In your opinion, why is it difficult to attract/retain health workers in your district? And are there any differences between women and men health workers in terms of retention?
3. How can you describe the relationship between health workers and community members in your district?
4. As a community leader, what actions have you already taken/supported to improve health workforce retention in your district?
5. What do you think is the role of the community in improving health workforce retention in the district? What support do you need to strengthen this role?

END OF INTERVIEW

**Tool 2: Health worker survey pre- and post-interventions**

1. **Questionnaire identifiers: to be filled in by the research team.**

| ID no. Questionnaire |  |
| --- | --- |
| 0.1 Facility |  |
| 0.2 District |  |
| 0.3 Date (DD/MM/YY) |  |
| 0.4 Informed consent | Yes/No |

1. **Socio-demographic characteristics**

In this section, please fill in the socio-demographic background information by ticking ☑ the appropriate box or inserting the years (e.g. 2024). Thank you very much!

| 1. Sex | ☐ | Female (1) |
| --- | --- | --- |
| ☐ | Male (0) |
| 1. Year of birth | ________ (YYYY) | |
| 1. What is your professional title? | ☐ | Physician (General Practitioner) (1) |
| ☐ | Specialized doctor (2) |
| ☐ | Assistant Medical Officer (3) |
| ☐ | Nurse (4) |
| ☐ | Nursing Assistant (5) |
| ☐ | Community Health Nurse (6) |
| ☐ | Psychiatry Nurse (7) |
| ☐ | Midwife (8) |
| ☐ | Other (9) |
| 1. When did you complete your latest qualification/degree? | _______(YYYY) | |
| 1. Are you posted with your family (spouse and children)? | ☐ | Yes |
| ☐ | No |
| 1. When did you start working in this health facility? | _____________ (MM/YY) | |
| 1. Do you have a signed contract of employment/official letter of appointment? | ☐ | Yes |
| ☐ | No |

1. **Staff satisfaction questions**

|  | **Strongly Disagree** | **Disagree** | **Neither Agree nor Disagree** | **Agree** | **Strongly Agree** | **Not Applicable** |
| --- | --- | --- | --- | --- | --- | --- |
|  | **1** | **2** | **3** | **4** | **5** | **6** |
| 1. **Teamwork** | | | | | | |
| 1. The staff at this healthcare facility work together as a well-coordinated team | ☐ | ☐ | ☐ | ☐ | ☐ | ☐ |
| 1. It is easy to get along with my colleagues | ☐ | ☐ | ☐ | ☐ | ☐ | ☐ |
| 1. I feel part of a team in working towards shared goals. | ☐ | ☐ | ☐ | ☐ | ☐ | ☐ |
| 1. I receive assistance from my colleagues when necessary | ☐ | ☐ | ☐ | ☐ | ☐ | ☐ |
| 1. I am satisfied with the relationship with my manager | ☐ | ☐ | ☐ | ☐ | ☐ | ☐ |
| 1. **Supervision** | | | | | | |
| 1. I have a clearly assigned supervisor at the facility level | ☐ | ☐ | ☐ | ☐ | ☐ | ☐ |
| 1. My supervisor meets with me regularly | ☐ | ☐ | ☐ | ☐ | ☐ | ☐ |
| 1. It is clear to me what my supervisor expects of me regarding my job performance | ☐ | ☐ | ☐ | ☐ | ☐ | ☐ |
| 1. I receive the right amount of support and guidance from my direct supervisor | ☐ | ☐ | ☐ | ☐ | ☐ | ☐ |
| 1. My supervisor gave me feedback on my performance in a talk/appraisal in the last 12 months | ☐ | ☐ | ☐ | ☐ | ☐ | ☐ |
| 1. My supervisor has strong management skills | ☐ | ☐ | ☐ | ☐ | ☐ | ☐ |
| 1. My work is evaluated based on a fair system of performance standards | ☐ | ☐ | ☐ | ☐ | ☐ | ☐ |
| 1. **Reward and recognition** | | | | | | |
| 1. My base pay is fair for my responsibilities | ☐ | ☐ | ☐ | ☐ | ☐ | ☐ |
| 1. The annual raise is reasonable | ☐ | ☐ | ☐ | ☐ | ☐ | ☐ |
| 1. I received the right amount of recognition or   praise for work that is well done | ☐ | ☐ | ☐ | ☐ | ☐ | ☐ |
| 1. The process used to determine promotions/annual raises is just and fair | ☐ | ☐ | ☐ | ☐ | ☐ | ☐ |
| 1. I am satisfied with my chances for promotion | ☐ | ☐ | ☐ | ☐ | ☐ | ☐ |
| 1. I am satisfied with the retirement plan | ☐ | ☐ | ☐ | ☐ | ☐ | ☐ |
| 1. **Empowerment and participation** | | | | | | |
| 1. I understand the vision of my healthcare facility | ☐ | ☐ | ☐ | ☐ | ☐ | ☐ |
| 1. I feel I have contributed to the facility's plan and mission | ☐ | ☐ | ☐ | ☐ | ☐ | ☐ |
| 1. I feel encouraged by my supervisor to offer suggestions and improvements | ☐ | ☐ | ☐ | ☐ | ☐ | ☐ |
| 1. The management makes changes based on my suggestions and feedback | ☐ | ☐ | ☐ | ☐ | ☐ | ☐ |
| 1. My job makes good use of my skills and abilities | ☐ | ☐ | ☐ | ☐ | ☐ | ☐ |
| 1. **Training and Individual Development** | | | | | | |
| 1. My initial training provided by the healthcare facility was sufficient | ☐ | ☐ | ☐ | ☐ | ☐ | ☐ |
| 1. I am provided with all trainings necessary for me to perform my job on an ongoing basis | ☐ | ☐ | ☐ | ☐ | ☐ | ☐ |
| 1. I received training /coaching related to my work in the last 12 months | ☐ | ☐ | ☐ | ☐ | ☐ | ☐ |
| 1. Training offered by the healthcare facility helps me to be effective and efficient in my job | ☐ | ☐ | ☐ | ☐ | ☐ | ☐ |
| 1. I have learned many new job skills in this position | ☐ | ☐ | ☐ | ☐ | ☐ | ☐ |
| 1. I have opportunities at work to learn and grow | ☐ | ☐ | ☐ | ☐ | ☐ | ☐ |
| 1. **Communication** | | | | | | |
| 1. My healthcare facility does a good job of keeping employees informed about matters affecting us | ☐ | ☐ | ☐ | ☐ | ☐ | ☐ |
| 1. Management clearly explains the reasons behind decisions on key issues | ☐ | ☐ | ☐ | ☐ | ☐ | ☐ |
| 1. I know where to go within the facility to obtain information that I need | ☐ | ☐ | ☐ | ☐ | ☐ | ☐ |
| 1. In this healthcare facility, it is difficult to speak up if I perceive a problem with patient care | ☐ | ☐ | ☐ | ☐ | ☐ | ☐ |
| 1. Disagreements in this healthcare facility are resolved appropriately for the best for the patient | ☐ | ☐ | ☐ | ☐ | ☐ | ☐ |
| 1. **Working conditions** | | | | | | |
| 1. I have an accurate written job description | ☐ | ☐ | ☐ | ☐ | ☐ | ☐ |
| 1. My job description corresponds to the reality of my work | ☐ | ☐ | ☐ | ☐ | ☐ | ☐ |
| 1. The amount of work expected of me is reasonable | ☐ | ☐ | ☐ | ☐ | ☐ | ☐ |
| 1. I am satisfied with my total working hours. | ☐ | ☐ | ☐ | ☐ | ☐ | ☐ |
| 1. I am given the flexibility in scheduling my working hours | ☐ | ☐ | ☐ | ☐ | ☐ | ☐ |
| 1. There is a good system for managing shifts so that all staff get a break during working hours | ☐ | ☐ | ☐ | ☐ | ☐ | ☐ |
| 1. I have regular leave from work | ☐ | ☐ | ☐ | ☐ | ☐ | ☐ |
| 1. There is a good system for managing how often staff are on-call at night | ☐ | ☐ | ☐ | ☐ | ☐ | ☐ |
| 1. My physical working conditions (buildings, grounds, lighting, ventilation, ergonomic, etc) are adequate for me to perform my work duties | ☐ | ☐ | ☐ | ☐ | ☐ | ☐ |
| 1. My department provides all the equipment, supplies, and resources necessary for me to perform my duties | ☐ | ☐ | ☐ | ☐ | ☐ | ☐ |
| 1. There is a good transportation system that allows me to reach easily to my workplace | ☐ | ☐ | ☐ | ☐ | ☐ | ☐ |
| 1. **Management** | | | | | | |
| 1. The management of this healthcare facility is supportive of me | ☐ | ☐ | ☐ | ☐ | ☐ | ☐ |
| 1. Management considers gender issues when addressing staffing at the health facility | ☐ | ☐ | ☐ | ☐ | ☐ | ☐ |
| 1. **General** | | | | | | |
| 1. I would recommend this health facility to other workers as a good place to work | ☐ | ☐ | ☐ | ☐ | ☐ | ☐ |
| 1. I would be very happy to spend the rest of my career at this health facility | ☐ | ☐ | ☐ | ☐ | ☐ | ☐ |

**Tool 4: Manager survey pre- and post-interventions**

1. **Questionnaire identifiers: to be filled in by the research team.**

| ID no. Questionnaire |  |
| --- | --- |
| 0.1 Facility |  |
| 0.2 District |  |
| 0.3 Date (DD/MM/YY) |  |
| 0.4 Informed consent | Yes/No |

1. **Socio-demographic characteristics: to be filled in by the respondent.**

In this section, please fill in the socio-demographic background information by ticking ☑ the appropriate box or inserting the years (e.g. 2024). Thank you very much!

| 1. Sex | ☐ | | Female (1) | | |
| --- | --- | --- | --- | --- | --- |
| ☐ | | Male (0) | | |
| 1. Year of birth | ________ (YYYY) | | | | |
| 1. What is your professional title? | ☐ | | Accountant *(1)* | | |
| ☐ | | Administrator *(2)* | | |
| ☐ | | Deputy Director of Nursing Services (3) | | |
| ☐ | | Disease Control Officer (4) | | |
| ☐ | | District Director of Health Services *(5)* | | |
| ☐ | | Health Information Officer *(6)* | | |
| ☐ | | Health Promotion Officer *(7)* | | |
| ☐ | | Human Resource Officer *(8)* | | |
| ☐ | | Nutrition Officer *(9)* | | |
| ☐ | | Pharmacist *(10)* | | |
| ☐ | | Principal Nursing Officer *(11)* | | |
| ☐ | | Public Health Nurse *(12)* | | |
| ☐ | | Other, *please specify (13)* | | |
| 1. What is your employment status? | ☐ | | Full time *(1)* | ☐ | Part-time *(2)* |
| 1. Do you have a supervisory role? | ☐ | | Yes *(1)* | ☐ | No *(2)* |
| 1. What is your educational background? (multiple answers allowed) | ☐ | | Public Health *(1)* | ☐ | Medical Doctor *(2)* |
| ☐ | | Nursing (*3)* | ☐ | Midwifery (*4)* |
| ☐ | | Accounting /Finance (*5)* | ☐ | HR Management (*6)* |
| ☐ | | Nutrition *(7)* | ☐ | Other, *please specify* (*8)* |
| 1. What is your highest qualification? | ☐ | | Certificate *(1)* | ☐ | Diploma *(2)* |
| ☐ | | 1st degree (Bachelor) *(3)* | ☐ | 2nd degree (Master’s) *(4)* |
| ☐ | | PhD *(5)* | ☐ | Other, *please specify (6)* |
| 1. How long have you been in your current position | ____years | | | | |
| 1. Have you received any formal training in management and/or leadership (i.e. certificate, diploma or degree) | ☐ | Yes, *please specify the type of training (1)*  ………………………………….. | | | |

1. **Management competencies to support staff retention**

|  | **Strongly Disagree** | **Disagree** | **Neither Agree nor Disagree** | **Agree** | **Strongly Agree** | **Not Applicable** |
| --- | --- | --- | --- | --- | --- | --- |
|  | **1** | **2** | **3** | **4** | **5** | **6** |
| 1. **Functional Support Systems** | | | | | | |
| 1. I have access to relevant national and/or regional policies and practices for staff retention | ☐ | ☐ | ☐ | ☐ | ☐ | ☐ |
| 1. I have a good understanding of those policies and practices | ☐ | ☐ | ☐ | ☐ | ☐ | ☐ |
| 1. I ensure that sub-district staff have access to and are familiar with policies and practices for staff retention | ☐ | ☐ | ☐ | ☐ | ☐ | ☐ |
| 1. I have adequate funds to carry out planned activities to retain my staff (e.g., rewards, training) | ☐ | ☐ | ☐ | ☐ | ☐ | ☐ |
| 1. I have adequate logistics and infrastructure to carry out planned activities to retain my staff | ☐ | ☐ | ☐ | ☐ | ☐ | ☐ |
| 1. **General managerial skills** | | | | | | |
| ***Interpersonal skills*** | | | | | | |
| 1. I have a clear understanding of the roles and responsibilities of staff under my supervision | ☐ | ☐ | ☐ | ☐ | ☐ | ☐ |
| 1. I ensure that staff under my supervision feel their contributions are valued and appreciated | ☐ | ☐ | ☐ | ☐ | ☐ | ☐ |
| 1. I value the importance of work family balance | ☐ | ☐ | ☐ | ☐ | ☐ | ☐ |
| 1. I respect diversity and differences among my staff members |  |  |  |  |  |  |
| ***Leadership skills*** | | | | | | |
| 1. I set clear and measurable targets for myself and staff under my supervision | ☐ | ☐ | ☐ | ☐ | ☐ | ☐ |
| 1. I encourage feedback on my performance and reflect and act on received suggestions | ☐ | ☐ | ☐ | ☐ | ☐ | ☐ |
| 1. I collect and analyse data related to staff performance improvement and satisfaction | ☐ | ☐ | ☐ | ☐ | ☐ | ☐ |
| 1. I actively seek opportunities to learn and develop so I can better support staff under my supervision | ☐ | ☐ | ☐ | ☐ | ☐ | ☐ |
| 1. I am confident in my abilities to direct and motivate people I work with | ☐ | ☐ | ☐ | ☐ | ☐ | ☐ |
| 1. I delegate work appropriately to staff, and provide them with the necessary support to meet their objectives | ☐ | ☐ | ☐ | ☐ | ☐ | ☐ |
| 1. I avoid staff getting fatigued by making sure they all have regular time off | ☐ | ☐ | ☐ | ☐ | ☐ | ☐ |
| 1. I support flexible staff schedule | ☐ | ☐ | ☐ | ☐ | ☐ | ☐ |
| 1. I ensure that my staff have clear written job descriptions | ☐ | ☐ | ☐ | ☐ | ☐ | ☐ |
| 1. I ensure that my staff have clearly assigned supervisors | ☐ | ☐ | ☐ | ☐ | ☐ | ☐ |
| 1. I ensure that annual appraisal talks are carried out regularly for my staff | ☐ | ☐ | ☐ | ☐ | ☐ | ☐ |
| 1. I ensure that the staff I supervise are supervised in a supportive way every quarter | ☐ | ☐ | ☐ | ☐ | ☐ | ☐ |
| 1. I make sure all staff receive timely and specific feedback from supervision visits | ☐ | ☐ | ☐ | ☐ | ☐ | ☐ |
| 1. I allocate resources to further training/in-service training of my staff | ☐ | ☐ | ☐ | ☐ | ☐ | ☐ |
| 1. I recognize and reward staff for positive performance | ☐ | ☐ | ☐ | ☐ | ☐ | ☐ |
| ***Conflict resolution skills*** | | | | | | |
| 1. I feel confident in managing and resolving conflicts when they arise | ☐ | ☐ | ☐ | ☐ | ☐ | ☐ |
| 1. **Problem analysis and intervention development** | | | | | | |
| 1. I am confident in identifying areas in need of improvement to retain staff under my supervision | ☐ | ☐ | ☐ | ☐ | ☐ | ☐ |
| 1. I am able to identify the root causes of problems | ☐ | ☐ | ☐ | ☐ | ☐ | ☐ |
| 1. I am able to prioritize which of the identified areas are most important to address | ☐ | ☐ | ☐ | ☐ | ☐ | ☐ |
| 1. When analysing problems, I take the different needs of male and female staff into account | ☐ | ☐ | ☐ | ☐ | ☐ | ☐ |
| 1. I am confident in my abilities to develop effective strategies to address an identified problem | ☐ | ☐ | ☐ | ☐ | ☐ | ☐ |
| 1. I consider how a strategy affect males and females staff differently | ☐ | ☐ | ☐ | ☐ | ☐ | ☐ |
| 1. **Employee-manager relationship / communication** | | | | | | |
| 1. I build a strong relationships and trust with my staff members | ☐ | ☐ | ☐ | ☐ | ☐ | ☐ |
| 1. As a team, we communicate often through various channels (i.e. spontaneous meetings, email, phone etc.) | ☐ | ☐ | ☐ | ☐ | ☐ | ☐ |
| 1. Relevant information is shared openly by all team members | ☐ | ☐ | ☐ | ☐ | ☐ | ☐ |
| 1. I include staff in the decision-making process | ☐ | ☐ | ☐ | ☐ | ☐ | ☐ |
| 1. I respond to my staff satisfaction needs | ☐ | ☐ | ☐ | ☐ | ☐ | ☐ |
| 1. I anticipate and communicate change to staff using multiple media | ☐ | ☐ | ☐ | ☐ | ☐ | ☐ |
| 1. **Overall Management Performance** | | | | | | |
| 1. Do you feel like your management and leadership competencies to retain your staff members could be improved? | ☐ | Yes | | ☐ | No | |
| 1. If yes to question 30, please specify which competencies you would like to improve |  | | | | | |

**Tool 5: Existing Human Resource Data**

**FACILITY LEVEL**

Please provide facility staff turnover data for the past 5 years with respect to the following indicators

|  | **Clinical Staff** |  |  |  |  |  |  |
| --- | --- | --- | --- | --- | --- | --- | --- |
|  | **Indicator** | **2023** | **2022** | **20221** | **2020** | **2019** | **Comments** |
| 1 | Total number of clinical staff positions expected to be filled by cadre (e.g. doctors, nurses etc.) |  |  |  |  |  |  |
| 2 | Number of unfilled clinical staff post in the past 5 years by cadre (e.g. doctors, nurses etc.) |  |  |  |  |  |  |
| 3 | Number of clinical staff posted to district in past 5 years by cadre (e.g. doctors, nurses etc.) |  |  |  |  |  |  |
| 4 | Number of clinical staff that refused posting to district by cadre (e.g. doctors, nurses etc.) |  |  |  |  |  |  |
| 5 | Number of clinical staff that reported at district but refused to stay by cadre (e.g. doctors, nurses etc.) |  |  |  |  |  |  |
| 6 | Number of clinical staff that left district by sex and cadre (e.g. doctors, nurses etc.) |  |  |  |  |  |  |
| 7 | Number of clinical staff granted study leave (e.g. doctors, nurses etc.) |  |  |  |  |  |  |
| 8 | Number of clinical staff qualified for study leave but denied (e.g. doctors, nurses etc.) |  |  |  |  |  |  |
| 9 | Number of supportive supervision visits by DHMT and national |  |  |  |  |  |  |
| 10 | Number of appraisals done per staff member |  |  |  |  |  |  |

**Non-Clinical Staff**

|  | **Indicator** | **2023** | **2022** | **20221** | **2020** | **2019** | **Comments** |
| --- | --- | --- | --- | --- | --- | --- | --- |
| 1 | Total number of non-clinical staff positions expected to be filled by cadre (e.g. Admin, HR etc.) |  |  |  |  |  |  |
| 2 | Number of unfilled non-clinical staff post in the past 5 years by cadre (e.g. Admin, HR etc.) |  |  |  |  |  |  |
| 3 | Number of non-clinical staff posted to district in the past 5 years by cadre (e.g. Admin, HR etc.) |  |  |  |  |  |  |
| 4 | Number of non-clinical staff that refused posting to district by cadre (e.g. Admin, HR etc.) |  |  |  |  |  |  |
| 5 | Number of non-clinical staff that reported at district but refused to stay by cadre (e.g. Admin, HR etc.) |  |  |  |  |  |  |
| 6 | Number of non-clinical staff that left district by sex and cadre (e.g. Admin, HR etc.) |  |  |  |  |  |  |
| 7 | Number of clinical staff granted study leave (e.g. Admin, HR etc.) |  |  |  |  |  |  |
| 8 | Number of clinical staff qualified for study leave but denied (e.g. Admin, HR etc.) |  |  |  |  |  |  |
| 9 | Number of supportive supervision visits by DHMT and national |  |  |  |  |  |  |
| 10 | Number of appraisals done per staff member |  |  |  |  |  |  |

**DHMT level**

Please provide DHMT staff turnover data for the past 5 years with respect to the following indicators

|  | **Indicator** | **2023** | **2022** | **20221** | **2020** | **2019** | **Comments** |
| --- | --- | --- | --- | --- | --- | --- | --- |
| 1 | Total number of staff positions expected to be filled by cadre |  |  |  |  |  |  |
| 2 | Number of unfilled staff post in the past 5 years by cadre |  |  |  |  |  |  |
| 3 | Number of staff posted to district in past 5 years by cadre |  |  |  |  |  |  |
| 4 | Number of staff that refused posting to district by cadre |  |  |  |  |  |  |
| 5 | Number of staff that reported at district but refused to stay by cadre |  |  |  |  |  |  |
| 6 | Number of clinical staff that left district by sex and cadre |  |  |  |  |  |  |
| 7 | Number of clinical staff granted study leave |  |  |  |  |  |  |
| 8 | Number of clinical staff qualified for study leave but denied |  |  |  |  |  |  |
| 9 | Number of supportive supervision visits by DHMT and national |  |  |  |  |  |  |
| 10 | Number of appraisals done per staff member |  |  |  |  |  |  |
